# Supplementary material
Source: publisher site journal article supplement (https://e-cmh.org/upload/media/cmh-2024-0038-Supplementary-Fig-4.pdf)
Supplement: Supplementary file 1 [file cmh-2024-0038-Supplementary-Fig-4.pdf]

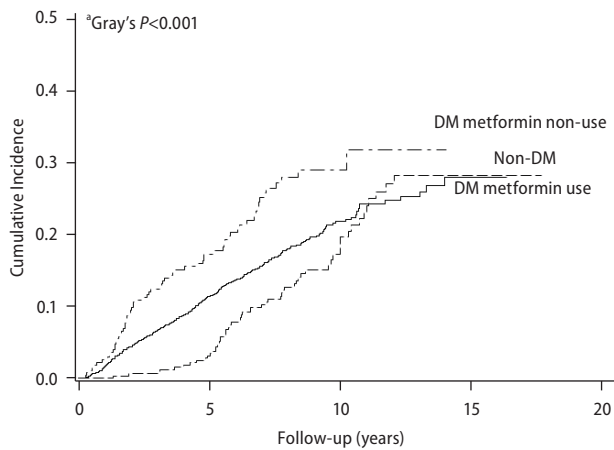

**A** The effects of DM with and without metformin for HCC risk after excluding 49 patients with eGFR < 30

| Groups               |                          | BL    | 1Y    | 3Y    | 5Y    | 8Y   | 10Y  | <sup>b</sup> Crude SHR<br>(95% CI)<br>P-value | <sup>b*</sup> Adjusted SHR<br>(95% CI)<br>P-value |
|----------------------|--------------------------|-------|-------|-------|-------|------|------|-----------------------------------------------|---------------------------------------------------|
| DM metformin non-use | No. at risk              | 276   | 272   | 229   | 170   | 72   | 20   | 1.59 (1.22-2.08)<br>P<0.001                   | 1.56 (1.18-2.07)<br>P=0.002                       |
|                      | Cumulative Incidence (%) |       | 2.5   | 12.3  | 17.2  | 27.9 | 28.8 |                                               |                                                   |
| DM metformin use     | No. at risk              | 331   | 331   | 321   | 292   | 189  | 93   | 0.80 (0.62-1.05)<br>P=0.106                   | 0.94 (0.72-1.24)<br>P=0.670                       |
|                      | Cumulative Incidence (%) |       | 0.0   | 0.6   | 3.1   | 12.6 | 19.6 |                                               |                                                   |
| Non-DM               | No. at risk              | 2,123 | 2,029 | 1,854 | 1,420 | 683  | 261  | 1                                             | 1                                                 |
|                      | Cumulative Incidence (%) |       | 1.6   | 6.6   | 11.4  | 17.9 | 21.7 |                                               |                                                   |

**Supplementary Figure 4.** The impact of DM with and without metformin (A) and HLP with and without statin (B) on the new-onset HCC after excluding 49 patients with eGFR <30 (n=2,730). (A) <sup>a</sup>After considering death as a competing risk, a Kaplan–Meier plot was constructed using Gray’s cumulative incidence method. <sup>b</sup>All SHRs (95% CIs) and P-values were calculated using the Cox sub-distribution hazards method. <sup>\*</sup>Adjusted for age, sex, LC, HCV GT1, HCV RNA, aspirin, and HLP/statin. DM, diabetes mellitus; HLP, hyperlipidemia; HCC, hepatocellular carcinoma; SHR, sub-distribution hazard ratio; LC, liver cirrhosis; GT, genotype. (B) <sup>a</sup>After considering death as a competing risk, a Kaplan–Meier plot was constructed using Gray’s cumulative incidence method. <sup>b</sup>All SHRs (95% CIs) and P-values were calculated using the Cox sub-distribution hazards method. <sup>\*</sup>Adjusted for age, sex, LC, HCV GT1, HCV RNA, aspirin, and DM/metformin. DM, diabetes mellitus; HLP, hyperlipidemia; HCC, hepatocellular carcinoma; SHR, sub-distribution hazard ratio; LC, liver cirrhosis; GT, genotype.

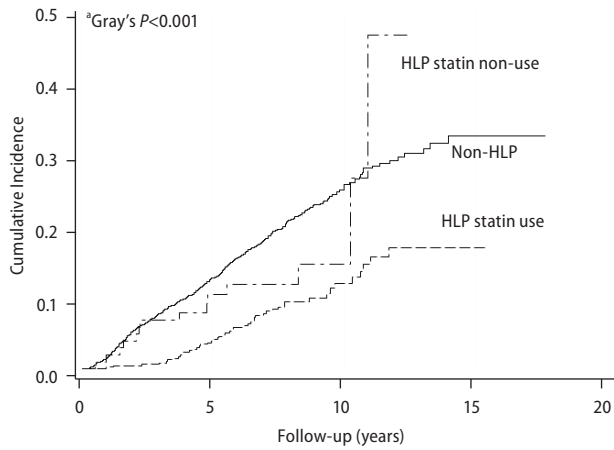

**B** The effects of HLP with and without statin for HCC risk after excluding 49 patients with  $eGFR < 30$

| Groups                |                          | BL    | 1Y    | 3Y    | 5Y    | 8Y   | 10Y  | <sup>b</sup> Crude SHR<br>(95% CI)<br><i>P</i> -value | <sup>b*</sup> Adjusted SHR<br>(95% CI)<br><i>P</i> -value |
|-----------------------|--------------------------|-------|-------|-------|-------|------|------|-------------------------------------------------------|-----------------------------------------------------------|
| HLP<br>statin non-use | No. at risk              | 104   | 100   | 90    | 59    | 32.0 | 7    | 0.73 (0.43-1.25)<br><i>P</i> =0.252                   | 0.68 (0.40-1.14)<br><i>P</i> =0.145                       |
|                       | Cumulative Incidence (%) |       | 1.9   | 6.7   | 10.3  | 11.8 | 14.5 |                                                       |                                                           |
| HLP<br>statin use     | No. at risk              | 489   | 486   | 474   | 417   | 236  | 108  | 0.42 (0.31-0.56)<br><i>P</i> <0.001                   | 0.45 (0.33-0.60)<br><i>P</i> <0.001                       |
|                       | Cumulative Incidence (%) |       | 0.2   | 0.8   | 3.8   | 9.3  | 11.9 |                                                       |                                                           |
| Non-HLP               | No. at risk              | 2,137 | 2,044 | 1,838 | 1,410 | 676  | 257  | 1                                                     | 1                                                         |
|                       | Cumulative Incidence (%) |       | 1.7   | 7.7   | 12.6  | 20.8 | 25.6 |                                                       |                                                           |

Supplementary Figure 4. Continued
